# Supplementary material
Source: PubMed Central journal article supplement (PMC6874887)
Supplement: NIHMS1047083-supplement-Supp_info.pdf [file NIHMS1047083-supplement-Supp_info.pdf]

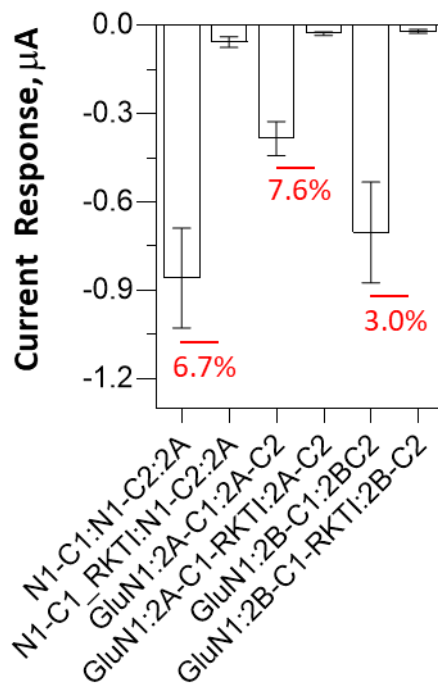

**Supp. Figure S1** Summary of current amplitude evoked by maximally effective concentrations of agonists (100 mM glutamate and 100 mM glycine) determined by TEVC recordings from *Xenopus* oocytes expressing tri-heteromeric receptors (Swanger et al., 2016; Hansen, Ogden, Yuan, & Traynelis, 2014; Yi, Zachariassen, Dorsett, & Hansen, 2018; Yuan et al., 2014). The R518K/T690I double mutations are located in the agonist-binding pocket for glutamate and glycine and abolish glutamate/glycine binding, thereby rendering NMDA receptors with either the GluN1 subunit, GluN2A subunit or GluN2B subunit non-functional. Any current responses observed for oocytes expressing RK,TI mutant are mediated by receptors that have escaped ER retention. GluN1/GluN1/2A ( $858 \pm 170$  nA,  $n = 14$ ), GluN1-RKTI/GluN1/2A ( $58 \pm 18$  nA,  $n = 14$ ); 2A/2A ( $385 \pm 58$  nA,  $n = 16$ ), 2A-RKTI/2A ( $29 \pm 6.0$  nA,  $n = 36$ ); and 2B/2B ( $704 \pm 171$  nA,  $n = 14$ ), 2B-RKTI/2B ( $21 \pm 6.2$  nA,  $n = 40$ ).

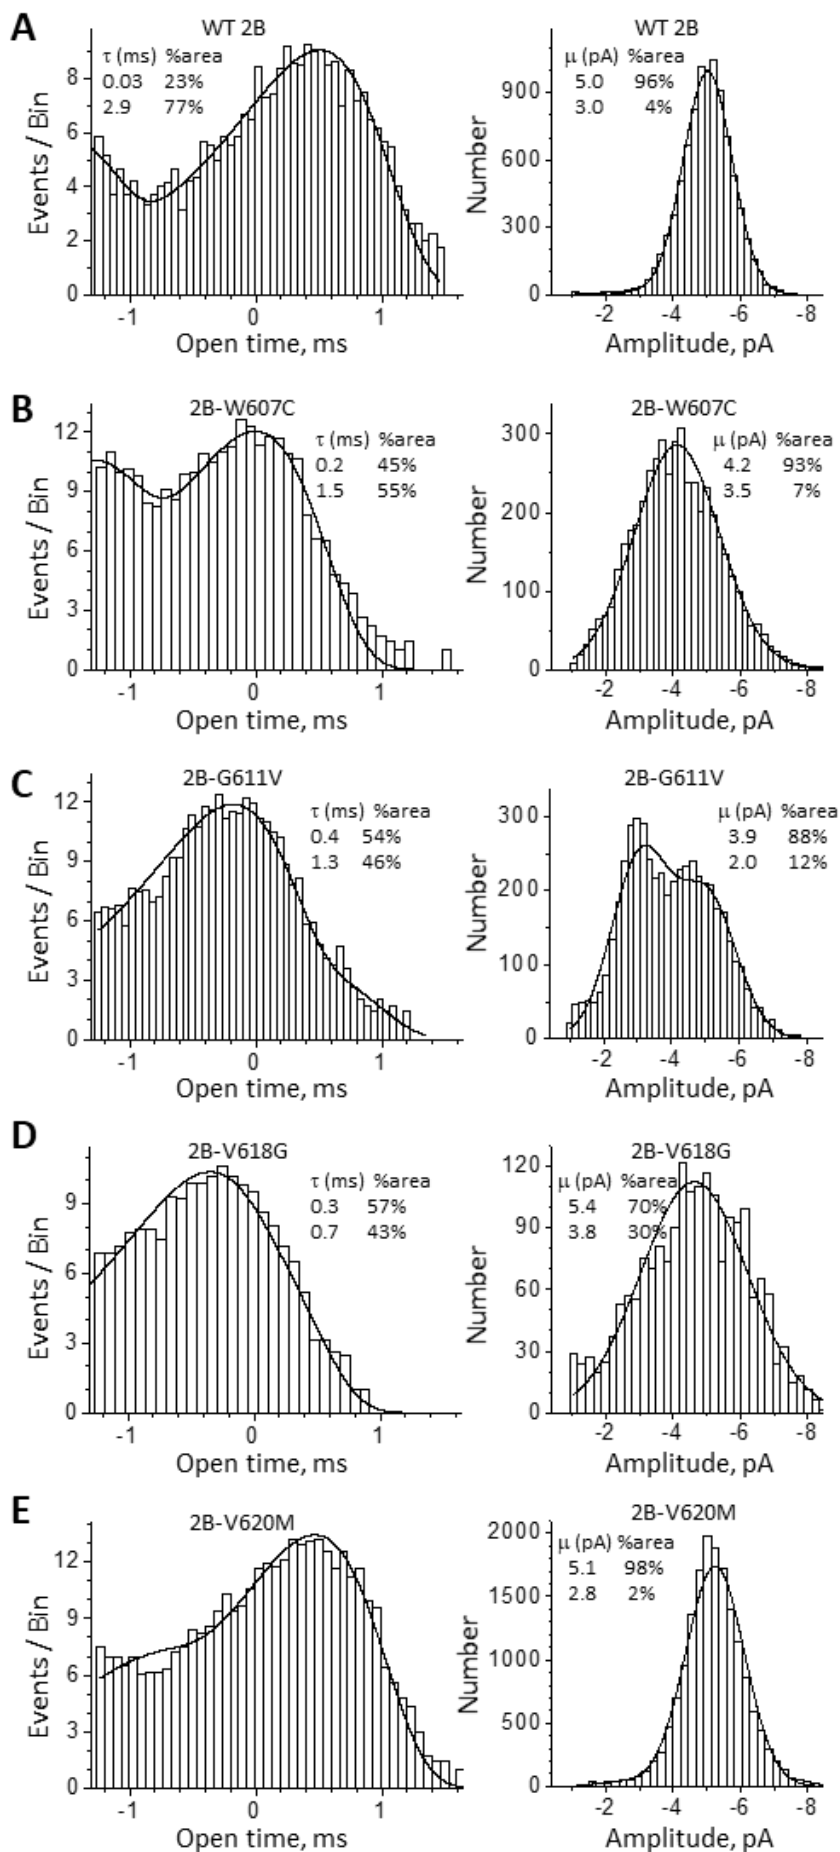

**Supp. Figure S2** The pooled open time duration histograms (*left panels*) and amplitude histograms (*right panels*) are shown for WT and the GluN2B M2 variants. Fitted and statistical parameters are given in Table 5 and Supp. Table S4.

**Supp. Table S2** Statistical analysis for data in Table 3

|                     |                |                    | <b>Glutamate EC<sub>50</sub></b> | <b>Glycine EC<sub>50</sub></b> | <b>%, pH6.8/pH7.6</b> |
|---------------------|----------------|--------------------|----------------------------------|--------------------------------|-----------------------|
| <b>GluN1/GluN2A</b> | <b>ANOVA</b>   | <b>F statistic</b> | F (5, 85) = 18.75                | F (5, 78) = 18.88              | F (5, 80) = 27.06     |
|                     |                | <b>P value</b>     | P<0.0001                         | P<0.0001                       | P<0.0001              |
|                     | <b>P-value</b> | <b>1-G618R/2A</b>  | 0.9996                           | 0.0013                         | 0.13                  |
|                     |                | <b>1-G620R/2A</b>  | 0.1459                           | 0.4463                         | <0.0001               |
|                     |                | <b>2A-L611Q</b>    | <0.0001                          | 0.0049                         | <0.0001               |
|                     |                | <b>2A-N614S</b>    | <0.0001                          | <0.0001                        | 0.0002                |
| <b>2A-N615K</b>     |                | 0.0004             | 0.0005                           | >0.9999                        |                       |
| <b>GluN1/GluN2B</b> | <b>ANOVA</b>   | <b>F statistic</b> | F (9, 114) = 6.206               | F (8, 124) = 11.29             | F (9, 117) = 9.542    |
|                     |                | <b>P value</b>     | P<0.0001                         | P<0.0001                       | P<0.0001              |
|                     | <b>P-value</b> | <b>1-G618R/2B</b>  | 0.9875                           | n.d.                           | 0.0393                |
|                     |                | <b>1-G620R/2B</b>  | 0.1505                           | 0.986                          | 0.9993                |
|                     |                | <b>2B-W607C</b>    | 0.0004                           | 0.9935                         | 0.0048                |
|                     |                | <b>2B-G611V</b>    | 0.9875                           | 0.0942                         | 0.087                 |
|                     |                | <b>2B-N615I</b>    | >0.9999                          | 0.0286                         | 0.0769                |
|                     |                | <b>2B-N615K</b>    | 0.5725                           | <0.0001                        | 0.9993                |
|                     |                | <b>2B-N616K</b>    | 0.0908                           | <0.0001                        | >0.9999               |
|                     |                | <b>2B-V618G</b>    | 0.9208                           | 0.5699                         | 0.0042                |
| <b>2B-V620M</b>     | 0.0936         | 0.1983             | 0.0006                           |                                |                       |

**Supp. Table S3** Statistical analysis for data in Table 4

|                          |              |                      | IC <sub>50</sub> , μM | % at 1 mM           | % at -60mV         |                    |
|--------------------------|--------------|----------------------|-----------------------|---------------------|--------------------|--------------------|
| di-heteromeric receptors | GluN1/GluN2A | ANOVA                | F statistic           | F (3, 65) = 194.3   | F (5, 98) = 140.8  | F (5, 88) = 76     |
|                          |              |                      | P value               | P<0.0001            | P<0.0001           | P<0.0001           |
|                          |              | P-value              | 1-G618R/2A            | n.d.                | <0.0001            | <0.0001            |
|                          |              |                      | 1-G620R/2A            | <0.0001             | <0.0001            | 0.0031             |
|                          |              |                      | 2A-L611Q              | <0.0001             | <0.0001            | <0.0001            |
|                          | 2A-N614S     |                      | <0.0001               | 0.0014              | 0.9025             |                    |
|                          | 2A-N615K     |                      | n.d.                  | <0.0001             | <0.0001            |                    |
|                          | GluN1/GluN2B | ANOVA                | F statistic           | F (2, 67) = 101     | F (9, 135) = 193.3 | F (8, 118) = 90.86 |
|                          |              |                      | P value               | P<0.0001            | P<0.0001           | P<0.0001           |
|                          |              | P-value              | 1-G618R/2B            | <0.0001             | <0.0001            | <0.0001            |
| 1-G620R/2B               |              |                      | n.d.                  | <0.0001             | <0.0001            |                    |
| 2B-W607C                 |              |                      | n.d.                  | <0.0001             | 0.0025             |                    |
| 2B-G611V                 |              |                      | n.d.                  | <0.0001             | <0.0001            |                    |
| 2B-N615I                 |              |                      | n.d.                  | <0.0001             | <0.0001            |                    |
| 2B-N615K                 |              |                      | n.d.                  | <0.0001             | <0.0001            |                    |
| 2B-N616K                 |              |                      | n.d.                  | <0.0001             | <0.0001            |                    |
| 2B-V618G                 |              |                      | n.d.                  | <0.0001             | 0.0012             |                    |
| 2B-V620M                 | <0.0001      |                      | 0.0726                | n.d.                |                    |                    |
| di-heteromeric receptors | GluN1/GluN2A | ANOVA                | F statistic           | F (2, 33) = 31.73   | F (2, 33) = 34.34  | F (2, 39) = 62.56  |
|                          |              |                      | P value               | P<0.0001            | P<0.0001           | P<0.0001           |
|                          | P-value      | 1-G620R/N1/2A        | 0.0001                | 0.0004              | 0.0738             |                    |
|                          |              | 1-G620R/1-G620R/2A   | <0.0001               | <0.0001             | <0.0001            |                    |
|                          | GluN1/GluN2A | ANOVA                | F statistic           | F (4, 87) = 98.44   | F (6, 105) = 151.6 | F (6, 102) = 174.8 |
|                          |              |                      | P value               | P<0.0001            | P<0.0001           | P<0.0001           |
|                          |              | P-value              | N1/2A-L611Q/2A        | <0.0001             | <0.0001            | <0.0001            |
|                          |              |                      | N1/2A-L611Q/2A-L611Q  | <0.0001             | <0.0001            | <0.0001            |
|                          |              |                      | N1/2A-N614S/2A        | <0.0001             | 0.6927             | 0.9825             |
|                          |              |                      | N1/2A-N614S/2A-N614S  | <0.0001             | 0.0807             | 0.2994             |
| N1/2A-N615K/2A           | n.d.         |                      | <0.0001               | <0.0001             |                    |                    |
| N1/2A-N615K/2A-N615K     | n.d.         | <0.0001              | <0.0001               |                     |                    |                    |
| GluN1/GluN2B             | ANOVA        | F statistic          | F (6, 120) = 28.45    | F (14, 199) = 261.5 | F (14, 266) = 66.1 |                    |
|                          |              | P value              | P<0.0001              | P<0.0001            | P<0.0001           |                    |
|                          | P-value      | N1/2B-W607C/2B       | 0.0002                | 0.5183              | 0.9998             |                    |
|                          |              | N1/2B-W607C/2B-W607C | <0.0001               | 0.0002              | 0.8144             |                    |
|                          |              | N1/2B-G611V/2B       | <0.0001               | <0.0001             | 0.181              |                    |
|                          |              | N1/2B-G611V/2B-G611V | n.d.                  | <0.0001             | 0.0002             |                    |
|                          |              | N1/2B-N615I/2B       | <0.0001               | 0.5793              | 0.2273             |                    |
|                          |              | N1/2B-N615I/2B-N615I | n.d.                  | <0.0001             | <0.0001            |                    |
|                          |              | N1/2B-N615K/2B       | n.d.                  | <0.0001             | <0.0001            |                    |
|                          |              | N1/2B-N615K/2B-N615K | n.d.                  | <0.0001             | <0.0001            |                    |
|                          |              | N1/2B-N616K/2B       | n.d.                  | <0.0001             | <0.0001            |                    |
|                          |              | N1/2B-N616K/2B-N616K | n.d.                  | <0.0001             | <0.0001            |                    |
|                          |              | N1/2B-V618G/2B       | n.d.                  | <0.0001             | 0.0036             |                    |
|                          |              | N1/2B-V618G/2B-V618G | n.d.                  | <0.0001             | <0.0001            |                    |
| N1/2B-V620M/2B           |              | <0.0001              | 0.1675                | 0.9682              |                    |                    |
| N1/2B-V620M/2B-V620M     | <0.0001      | 0.0002               | 0.8456                |                     |                    |                    |

**Supp. Table S4** Statistical analysis for data in Table 5

|              |         | deactivation tw,<br>amplitude, pA/pF<br>ms |                    | P <sub>OPEN</sub> , MTSEA | Mean open time,<br>ms | main<br>conductance, pS | Pca/PNa           | surface/total ratio<br>(b-lac) |                   |
|--------------|---------|--------------------------------------------|--------------------|---------------------------|-----------------------|-------------------------|-------------------|--------------------------------|-------------------|
| GluN1/GluN2A | ANOVA   | F statistic                                | F (5, 65) = 3.861  | F (3, 53) = 15.82         | F (3, 65) = 52.88     | F (2, 6) = 6.909        | F (2, 6) = 117.1  | F (3, 22) = 40.61              | F (3, 26) = 3.417 |
|              |         | P value                                    | P=0.0040           | P<0.0001                  | P<0.0001              | P=0.0278                | P<0.0001          | P<0.0001                       | P=0.0321          |
|              | P-value | 1-G618R/2A                                 | 0.0297             | n.d.                      | <0.0001               | n.d.                    | n.d.              | n.d.                           | <0.0001           |
|              |         | 1-G620R/2A                                 | 0.0202             | 0.2086                    | <0.0001               | n.d.                    | n.d.              | <0.0001                        | <0.0001           |
|              |         | 2A-L611Q                                   | 0.932              | <0.0001                   | 0.0049                | 0.0969                  | 0.0003            | <0.0001                        | 0.7047            |
|              |         | 2A-N614S                                   | 0.0109             | n.d.                      | <0.0001               | n.d.                    | n.d.              | n.d.                           | 0.0102            |
| 2A-N615K     |         | 0.796                                      | 0.8099             | 0.0006                    | 0.3764                | <0.0001                 | <0.0001           | 0.8663                         |                   |
| GluN1/GluN2B | ANOVA   | F statistic                                | F (9, 117) = 7.368 | F (8, 111) = 5.037        | F (6, 121) = 26.36    | F (4, 12) = 5.222       | F (4, 12) = 2.646 | F (3, 19) = 34.74              | F (7, 32) = 3.184 |
|              |         | P value                                    | P<0.0001           | P<0.0001                  | P<0.0001              | P=0.0113                | P=0.0858          | P<0.0001                       | P=0.0113          |
|              | P-value | 1-G618R/2B                                 | 0.0094             | n.d.                      | n.d.                  | n.d.                    | n.d.              | n.d.                           | <0.0001           |
|              |         | 1-G620R/2B                                 | <0.0001            | 0.3072                    | n.d.                  | n.d.                    | n.d.              | n.d.                           | <0.0001           |
|              |         | 2B-W607C                                   | 0.001              | 0.3926                    | <0.0001               | 0.0303                  | 0.4346            | n.d.                           | 0.8521            |
|              |         | 2B-G611V                                   | 0.0098             | 0.137                     | <0.0001               | 0.0187                  | 0.1691            | n.d.                           | 0.6657            |
|              |         | 2B-N615I                                   | 0.0096             | 0.9901                    | 0.0007                | n.d.                    | n.d.              | <0.0001                        | 0.866             |
|              |         | 2B-N615K                                   | 0.0114             | 0.9651                    | <0.0001               | n.d.                    | n.d.              | n.d.                           | 0.037             |
|              |         | 2B-N616K                                   | 0.5422             | 0.8549                    | <0.0001               | n.d.                    | n.d.              | n.d.                           | 0.9759            |
|              |         | 2B-V618G                                   | 0.0004             | 0.2176                    | n.d.                  | 0.0241                  | 0.8648            | 0.0068                         | 0.2808            |
| 2B-V620M     | 0.7917  | 0.0126                                     | <0.0001            | 0.9675                    | 0.9983                | 0.001                   | 0.0726            |                                |                   |

**Supp. Table S5** Summary of patch clamp data with a brief application

|                       | amplitude, pA/pF | deactivation $\tau_w$ , ms | charge transfer, pA·ms/pF |
|-----------------------|------------------|----------------------------|---------------------------|
| <b>WT GluN1/WT 2A</b> | 154 ± 30 (18)    | 47 ± 3.4 (18)              | 7,600                     |
| <b>1-G618R/2A</b>     | 2.1 ± 0.84 (8)*  | n.d.                       | n.d.                      |
| <b>1-G620R/2A</b>     | 24 ± 7.8 (12)*   | 20 ± 2.2 (12)*             | 533                       |
| <b>2A-L611Q</b>       | 128 ± 26 (15)    | 67 ± 8.8 (15)*             | 7,686                     |
| <b>2A-N614S</b>       | n.d.             | n.d.                       | n.d.                      |
| <b>2A-N615K</b>       | 126 ± 36 (10)    | 48 ± 4.4 (10)              | 6,031                     |
| <b>WT GluN1/WT 2B</b> | 41 ± 9.4 (16)    | 548 ± 50 (18)              | 22,131                    |
| <b>1-G618R/2B</b>     | n.d.             | n.d.                       | n.d.                      |
| <b>1-G620R/2B</b>     | 2.1 ± 0.56 (10)* | 328 ± 22 (10)              | 749                       |
| <b>2B-W607C</b>       | 4.3 ± 1.9 (10)*  | 414 ± 93 (9)               | 1,554                     |
| <b>2B-G611V</b>       | 11 ± 3.2 (9)     | 949 ± 87 (9)*              | 10,638                    |
| <b>2B-N615I</b>       | 15 ± 4.1 (15)    | 472 ± 30 (15)              | 7,108                     |
| <b>2B-N615K</b>       | 6.1 ± 2.2 (7)    | 639 ± 71 (7)               | 3,845                     |
| <b>2B-N616K</b>       | 28 ± 18 (6)      | 714 ± 89 (6)               | 17,069                    |
| <b>2B-V618G</b>       | 7.8 ± 3.9 (11)   | 749 ± 86 (11)              | 7,640                     |
| <b>2B-V620M</b>       | 67 ± 15 (16)     | 658 ± 63 (16)              | 39,071                    |

Data were expressed as Mean ± SEM (n).

n.d. not determined due to too small current.

\*p < 0.05 one way ANOVA, with Dunnett's multiple comparisons test, controlled FWER (family wise error rate) by using the Holm-Bonferroni correction.

**Supp. Table S6** Statistical analysis for data in Supp. Table S5

|                     |                |             | <b>amplitude, pA/pF    deactivation tw, ms</b> |                   |
|---------------------|----------------|-------------|------------------------------------------------|-------------------|
| <b>GluN1/GluN2A</b> | <b>ANOVA</b>   | F statistic | F (4, 58) = 5.73                               | F (3, 51) = 13.51 |
|                     |                | P value     | P=0.0006                                       | P<0.0001          |
|                     | <b>P-value</b> | 1-G618R/2A  | 0.002                                          | n.d.              |
|                     |                | 1-G620R/2A  | 0.0026                                         | 0.0011            |
|                     |                | 2A-L611Q    | 0.8627                                         | 0.0118            |
|                     |                | 2A-N614S    | n.d.                                           | n.d.              |
| 2A-N615K            |                | 0.8785      | 0.9994                                         |                   |
| <b>GluN1/GluN2B</b> | <b>ANOVA</b>   | F statistic | F (8, 91) = 6.409                              | F (8, 92) = 7.383 |
|                     |                | P value     | P<0.0001                                       | P<0.0001          |
|                     | <b>P-value</b> | 1-G618R/2B  | n.d.                                           | n.d.              |
|                     |                | 1-G620R/2B  | 0.019                                          | 0.0733            |
|                     |                | 2B-W607C    | 0.0306                                         | 0.5403            |
|                     |                | 2B-G611V    | 0.132                                          | 0.0002            |
|                     |                | 2B-N615I    | 0.142                                          | 0.8884            |
|                     |                | 2B-N615K    | 0.0938                                         | 0.9252            |
|                     |                | 2B-N616K    | 0.9532                                         | 0.468             |
|                     |                | 2B-V618G    | 0.0523                                         | 0.1027            |
| 2B-V620M            | 0.1193         | 0.5825      |                                                |                   |

**Supp. Table S7** Summary of beta-lac total protein

|                | total (b-lac)    |
|----------------|------------------|
| WT GluN1/WT 2A | 1.0 ± 0.11 (10)  |
| 1-G618R/2A     | 0.68 ± 0.11 (4)* |
| 1-G620R/2A     | 0.34 ± 0.14 (4)* |
| 2A-L611Q       | 0.93 ± 0.15 (11) |
| 2A-N614S       | 0.19 ± 0.02 (4)* |
| 2A-N615K       | 0.89 ± 0.14 (4)  |
| WT GluN1/WT 2B | 1.0 ± 0.10 (10)  |
| 1-G618R/2B     | 1.1 ± 0.08 (4)*  |
| 1-G620R/2B     | 1.4 ± 0.2 (4)*   |
| 2B-W607C       | 1.1 ± 0.22 (4)   |
| 2B-G611V       | 1.3 ± 0.13 (3)   |
| 2B-N615I       | 0.91 ± 0.12 (7)  |
| 2B-N615K       | 0.62 ± 0.08 (4)  |
| 2B-N616K       | 0.94 ± 0.07 (3)  |
| 2B-V618G       | 0.89 ± 0.15 (5)  |
| 2B-V620M       | 0.57 ± 0.07 (4)* |

\*p < 0.05 one way ANOVA, with Dunnett's multiple comparisons test.



**Supp. Table S8** Statistical analysis for beta-lac total protein

|                     |                    |                    | <b>total (b-lac)</b> |
|---------------------|--------------------|--------------------|----------------------|
| <b>GluN1/GluN2A</b> | <b>ANOVA</b>       | <b>F statistic</b> | F (2, 9) = 305988    |
|                     |                    | <b>P value</b>     | P<0.0001             |
|                     | <b>P-value</b>     | <b>1-G618R/2A</b>  | <0.0001              |
|                     |                    | <b>1-G620R/2A</b>  | <0.0001              |
| <b>ANOVA</b>        | <b>F statistic</b> | F (3, 22) = 5.168  |                      |
|                     | <b>P value</b>     | P=0.0074           |                      |
| <b>P-value</b>      | <b>2A-L611Q</b>    | 0.9558             |                      |
|                     | <b>2A-N614S</b>    | 0.0041             |                      |
|                     | <b>2A-N615K</b>    | 0.9343             |                      |
| <b>GluN1/GluN2B</b> | <b>ANOVA</b>       | <b>F statistic</b> | F (2, 9) = 216383    |
|                     |                    | <b>P value</b>     | P<0.0001             |
|                     | <b>P-value</b>     | <b>1-G618R/2B</b>  | <0.0001              |
|                     |                    | <b>1-G620R/2B</b>  | <0.0001              |
|                     | <b>ANOVA</b>       | <b>F statistic</b> | F (7, 32) = 3.69     |
|                     |                    | <b>P value</b>     | P=0.0049             |
|                     | <b>P-value</b>     | <b>2B-W607C</b>    | 0.917                |
| <b>2B-G611V</b>     |                    | 0.2713             |                      |
| <b>2B-N615I</b>     |                    | 0.9637             |                      |
| <b>2B-N615K</b>     |                    | 0.0702             |                      |
| <b>2B-N616K</b>     |                    | 0.9994             |                      |
| <b>2B-V618G</b>     |                    | 0.9317             |                      |
| <b>2B-V620M</b>     |                    | 0.0299             |                      |
